# Supplementary material
Source: publisher site journal article supplement (https://www.dovepress.com/article/260988)
Supplement: Supplementary file 1 [file get_supplementary_file.php]

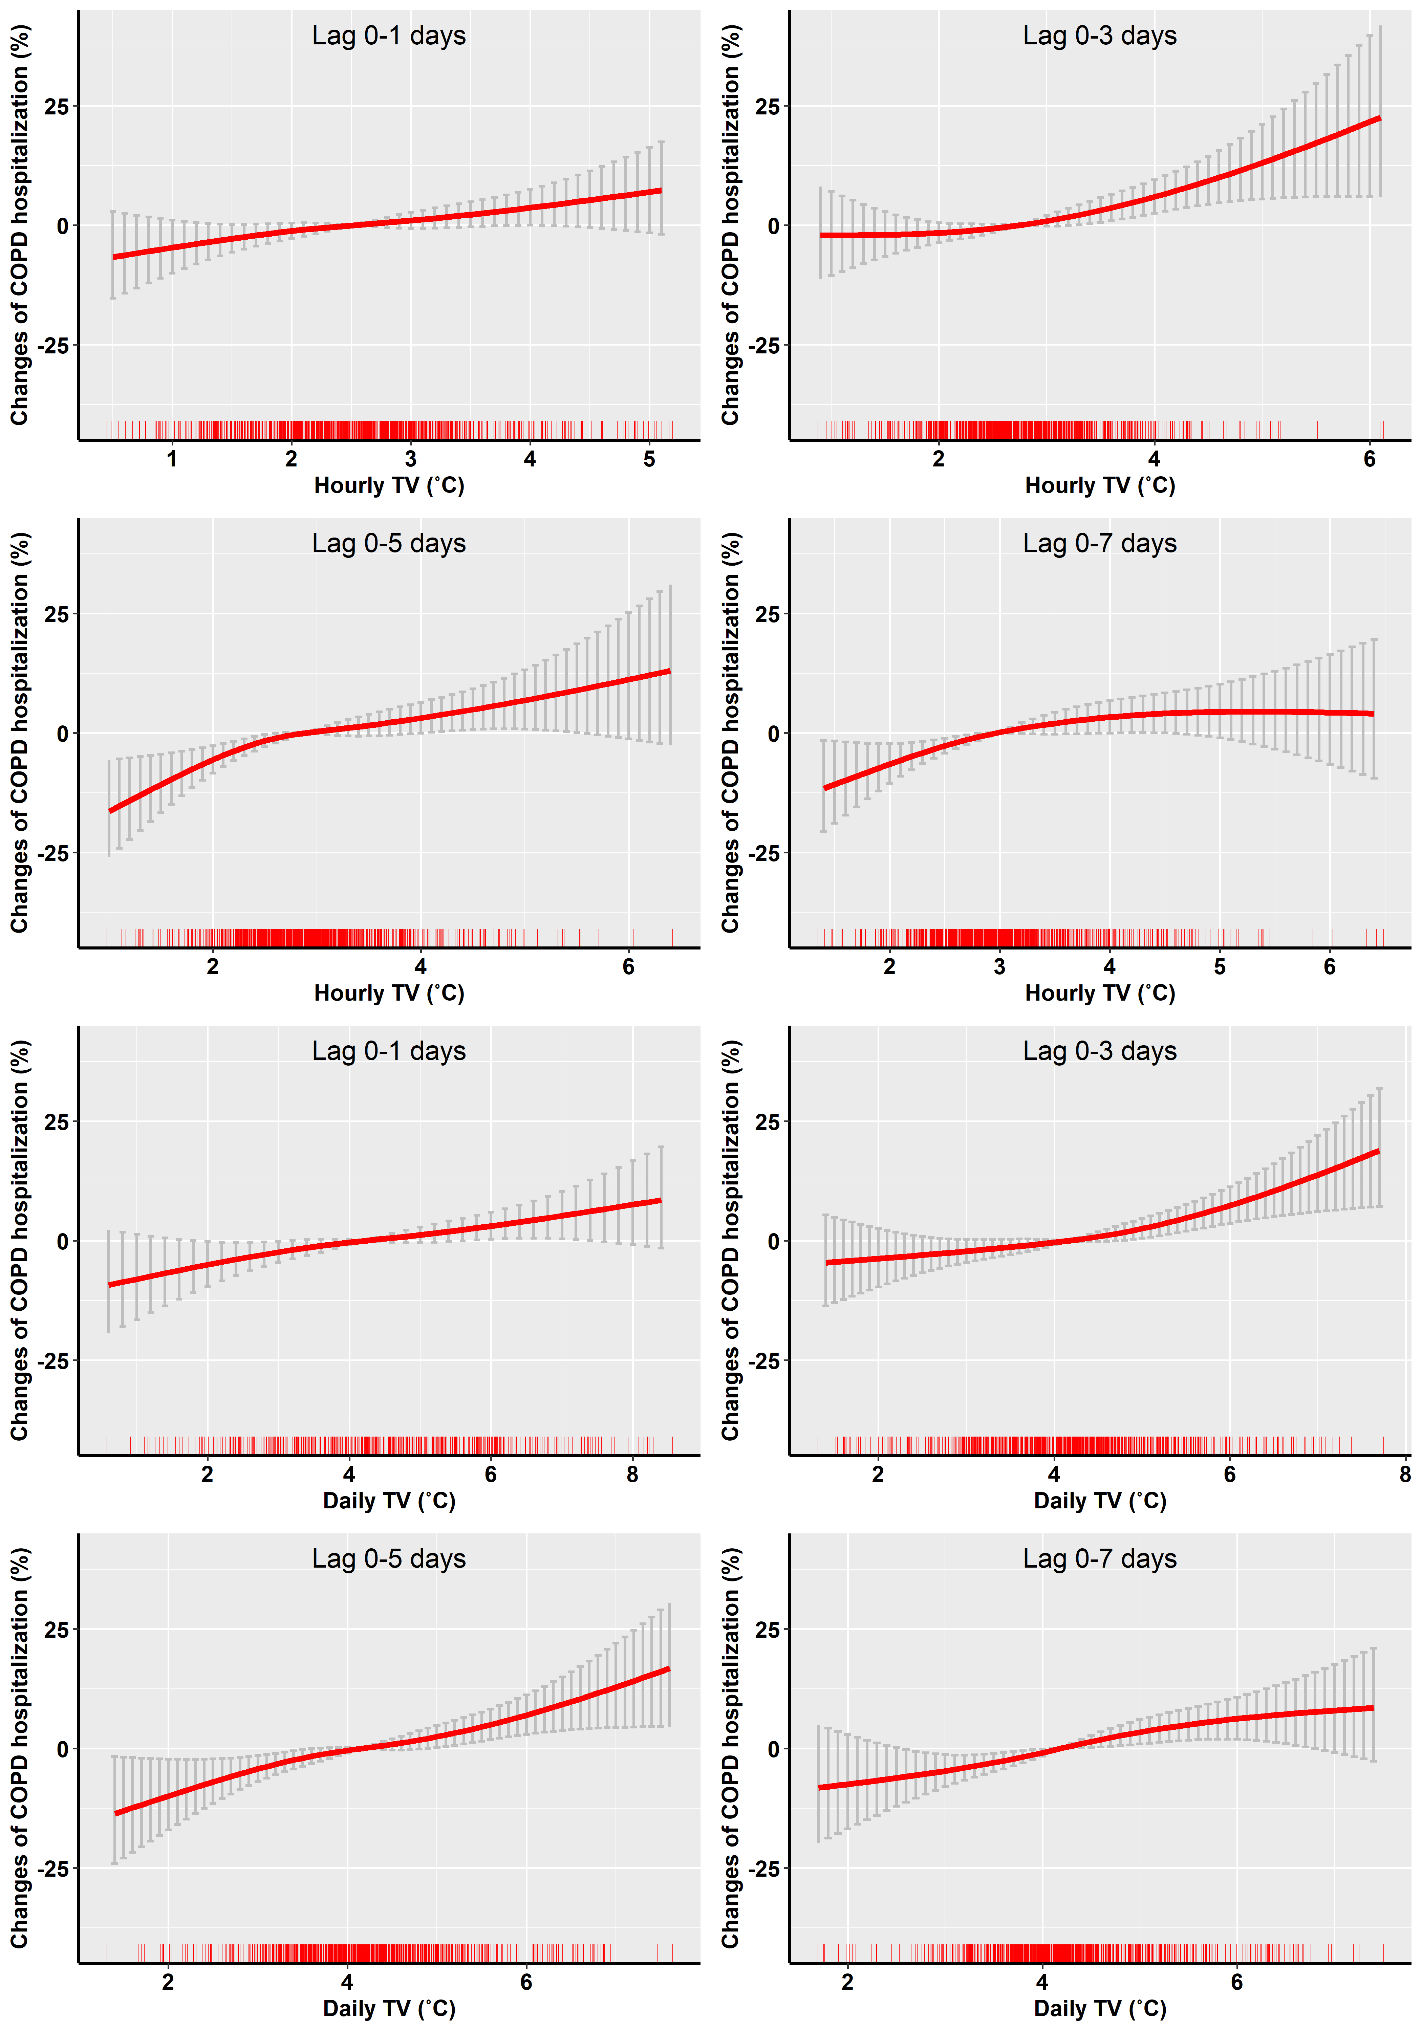


**Figure S1:** **Exposure-response curves of temperature variability and COPD hospitalization using natural cubic spline with 3 degree of freedom across various exposure days.** COPD is the chronic obstructive pulmonary disease. TV is temperature variability.

**Table S1** Daily COPD hospitalization change associated with 1 ℃ increase in temperature variability over lag 0-6 days after controlling for air pollutants and other meteorological factors

| Models | **Hourly TV** | **Daily TV** |
| --- | --- | --- |
| Main model (Adjustment for mean temperature and relative humidity) | 4.3 (2.2–6.4) | 4.0 (2.3–5.8) |
| Additional adjustment for PM2.5 | 4.2 (2.0–6.4) | 3.9 (2.1–5.8) |
| Additional adjustment for PM10 | 4.0 (1.9–6.2) | 3.7 (1.9–5.6) |
| Additional adjustment for NO2 | 4.0 (1.8–6.2) | 3.6 (1.7–5.5) |
| Additional adjustment for SO2 | 4.3 (2.2–6.6) | 4.0 (2.2–5.9) |
| Additional adjustment for O3 | 4.6 (2.4–6.8) | 4.3 (2.5–6.2) |
| Additional adjustment for CO | 4.2 (2.1–6.5) | 4.0 (2.1–5.8) |
| Additional adjustment for wind speed | 4.2 (2.1–6.3) | 3.9 (2.2–5.7) |
| Additional adjustment for visibility | 4.2 (2.1–6.3) | 3.9 (2.2–5.7) |

**Abbreviations:** TV, temperature variability.

**Note:** Linear term of air pollutants and natural cubic spline with 3 df of wind speed or visibility were included in the main model separately.


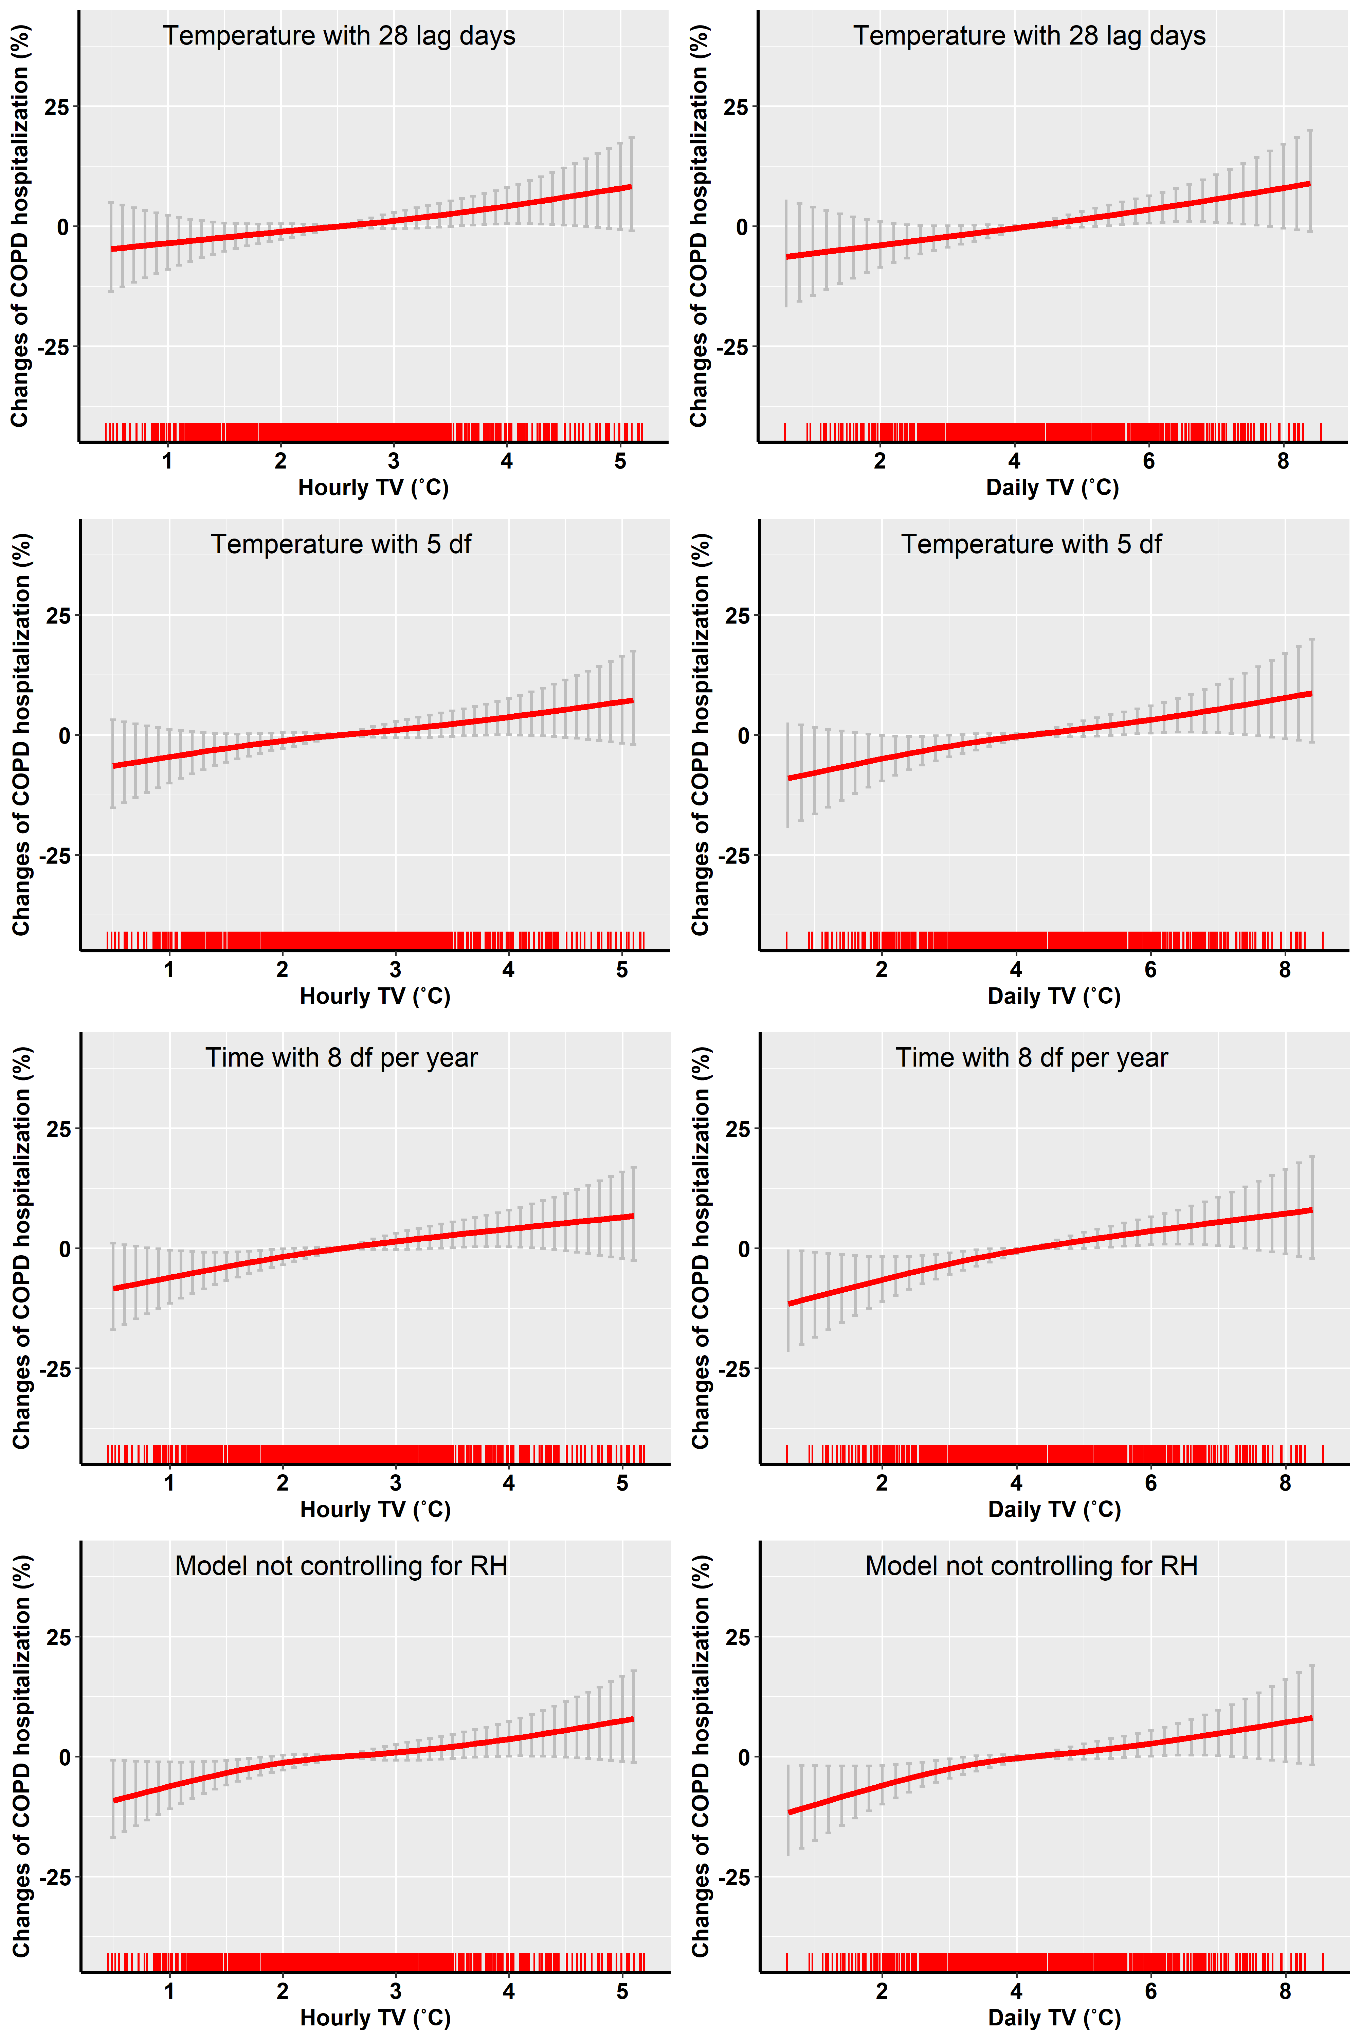


**Figure S2:** **Relationships between temperature variability and COPD hospitalization for models with alternative parameters.** COPD is the chronic obstructive pulmonary disease. The df is degree of freedom. RH is relative humidity. TV is temperature variability.

**Table S2** The percentage change (%) of daily COPD hospitalization associated with 1 oC increase in TV over lag 0–6 days for subgroups, based on data excluding patients with age less than 40 years

|  | **Hourly TV** | | | **Daily TV** | | |
| --- | --- | --- | --- | --- | --- | --- |
|  | **PC (95% CI)** | **Z-test** | **P-value** | **PC (95% CI)** | **Z-test** | **P-value** |
| Overall | 4.4 (2.4–6.6) | — | — | 4.2 (2.4–5.9) | — | — |
| Emergency admission | 5.5 (2.9–8.2) | Ref | Ref | 5.7 (3.5–8.0) | Ref | Ref |
| Non-emergency admission | 3.8 (1.3–6.4) | -0.921 | 0.357 | 3.3 (1.2–5.5) | -1.508 | 0.132 |
| Sex |  |  |  |  |  |  |
| Male | 4.8 (2.6–7.0) | Ref | Ref | 4.6 (2.7–6.4) | Ref | Ref |
| Female | 3.1 (-0.2–6.6) | -0.819 | 0.413 | 2.8 (0.0–5.6) | -1.033 | 0.302 |
| Age (years) |  |  |  |  |  |  |
| 40–64 | 7.3 (3.2–11.4) | Ref | Ref | 6.5 (3.1–10.0) | Ref | Ref |
| 65+ | 4.0 (1.8–6.1) | -1.412 | 0.158 | 3.8 (2.0–5.6) | -1.415 | 0.157 |
| Occupation |  |  |  |  |  |  |
| White collar | 1.6 (-6.3–10.1) | Ref | Ref | 3.7 (-3.1–11.0) | Ref | Ref |
| Blue collar | 7.8 (3.4–12.4) | 1.280 | 0.201 | 6.6 (2.9–10.5) | 0.700 | 0.484 |
| Unemployed | 4.4 (2.0–6.9) | 0.645 | 0.519 | 3.9 (1.9–6.0) | 0.051 | 0.960 |
| Marital status |  |  |  |  |  |  |
| Unmarried | -0.6 (-13.6–14.3) | Ref | Ref | 0.6 (-10.6–13.2) | Ref | Ref |
| Married | 4.5 (2.4–6.6) | 0.693 | 0.488 | 4.2 (2.5–6.0) | 0.584 | 0.559 |
| Divorced/widowed | 9.0 (-0.1–18.9) | 1.097 | 0.273 | 9.9 (2.0–18.3) | 1.243 | 0.214 |
| Season |  |  |  |  |  |  |
| Spring | 2.6 (-1.1–6.6) | Ref | Ref | 3.8 (0.5–7.2) | Ref | Ref |
| Summer | 4.3 (-3.8–13.1) | 0.361 | 0.718 | 7.7 (0.2–15.8) | 0.916 | 0.360 |
| Autumn | 1.6 (-4.2–7.8) | -0.274 | 0.784 | 3.2 (-1.6–8.2) | -0.198 | 0.843 |
| Winter | 4.4 (-0.1–9.2) | 0.590 | 0.555 | 3.5 (-0.4–7.6) | -0.095 | 0.924 |

**Abbreviations:** Ref, reference groups; TV, temperature variability; CI, confidence interval; PC, percentage change.
